# Supplementary material
Source: publisher figshare collection journal article supplement (https://gsapubs.figshare.com/articles/dataset/_/12274991)
Supplement: Supplementary file 1 [file 1]

Dongfang Song, Wenjiao Xiao, Brian F. Windley, and Chunming Han, 2020, Provenance and tectonic setting of late Paleozoic sedimentary rocks from the Alxa Tectonic Belt (NW China): Implications for accretionary tectonics of the southern Central Asian Orogenic Belt: GSA Bulletin, <https://doi.org/10.1130/B35652.1>.

## Supplemental Material

**Table S1.** whole rock major and trace element data.

**Table S2.** U-Pb analytical results.

**Table S3.** Lu-Hf isotopic compositions.

**Table S4.**  $\varepsilon_{\text{Hf}}(t)$  data for the Permian sedimentary basin in the southwestern Alxa.

**Table S5.** Data compiled from Eizenhöfer et al. (2015), Heumann et al. (2012), and Song et al. (2018).
